# Supplementary material
Source: PubMed Central journal article supplement (PMC3545359)
Supplement: Supp_Fig1.pdf [file Supp_Fig1.pdf]

## Supplementary Data

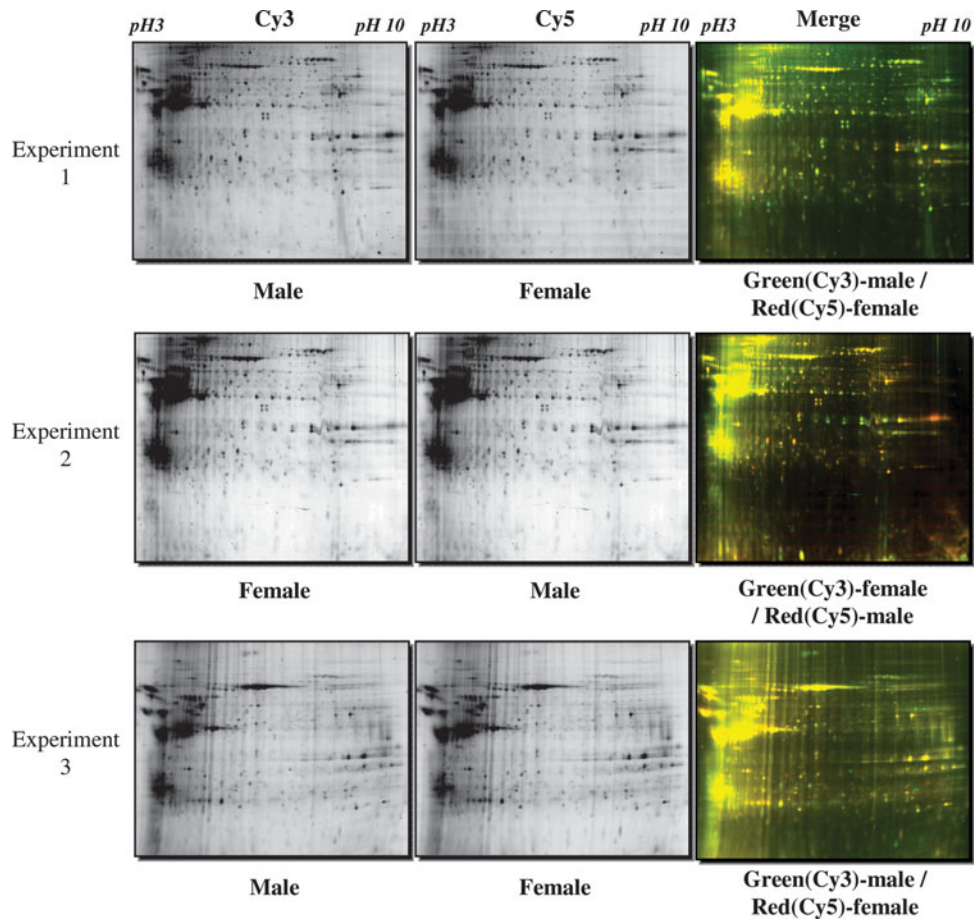

**SUPPLEMENTARY FIG. S1.** 2D-DIGE analysis of gender-dependent differentially expressed proteins between male and female fetal cells in amniotic fluid. Protein samples (150  $\mu$ g each) were labeled with Cy3/Cy5 and separated using 24 cm, pH 3–10 nonlinear IPG strips. 2D-DIGE images of the protein samples from male fetal cells and female fetal cells at appropriate excitation and emission wavelengths are shown (left and middle images) as well as overlaid pseudocolored image processed with ImageQuant Tool (GE Healthcare) (right images).
