# Supplementary material
Source: PubMed Central journal article supplement (PMC3545359)
Supplement: Supp_Fig2.pdf [file Supp_Fig2.pdf]

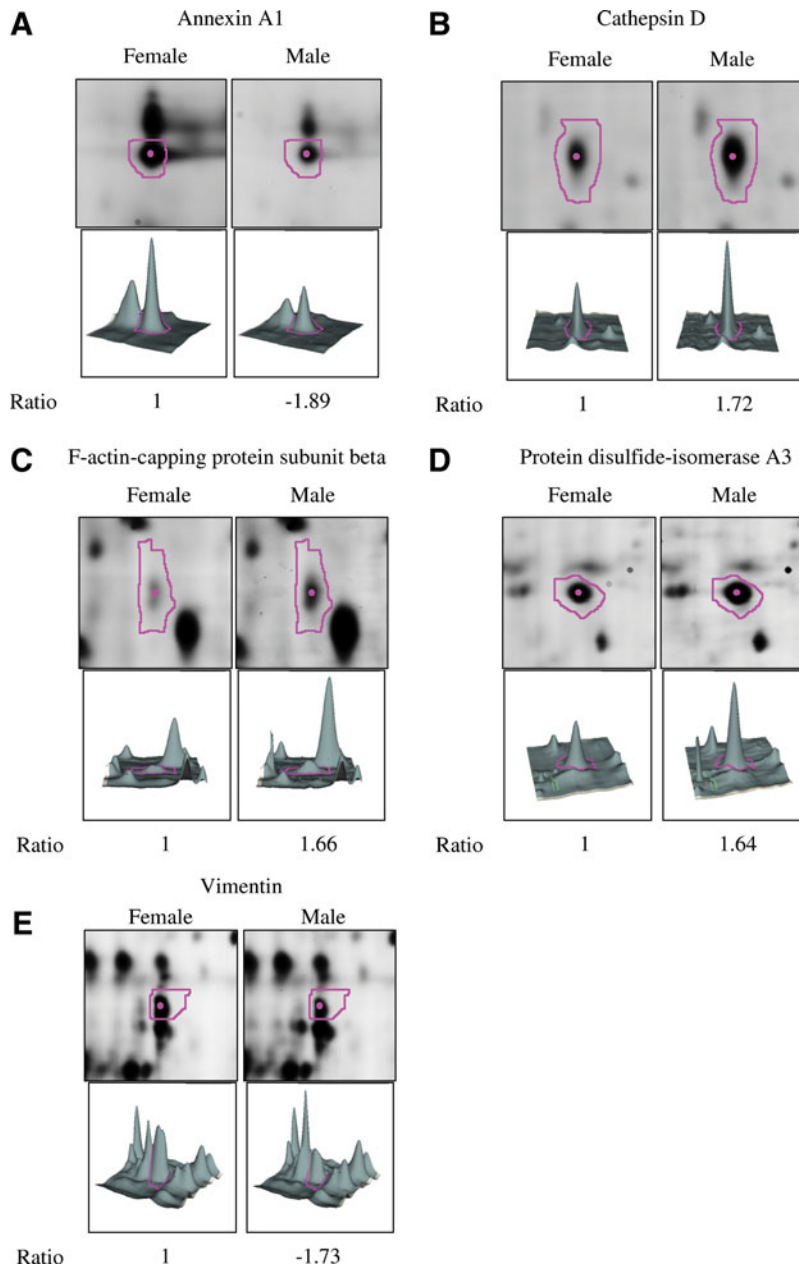

**SUPPLEMENTARY FIG. S2.** Representative images of the identified spots (A) annexin A1; (B) cathepsin D; (C) F-actin-capping protein subunit beta; (D) protein disulfide-isomerase; (E) vimentin displaying gender-dependent protein expression changes.
